# Supplementary material
Source: publisher site journal article supplement (https://www.dovepress.com/article/603569)
Supplement: Supplementary file 1 [file 603569_Supplementary%20Materials_1.docx]

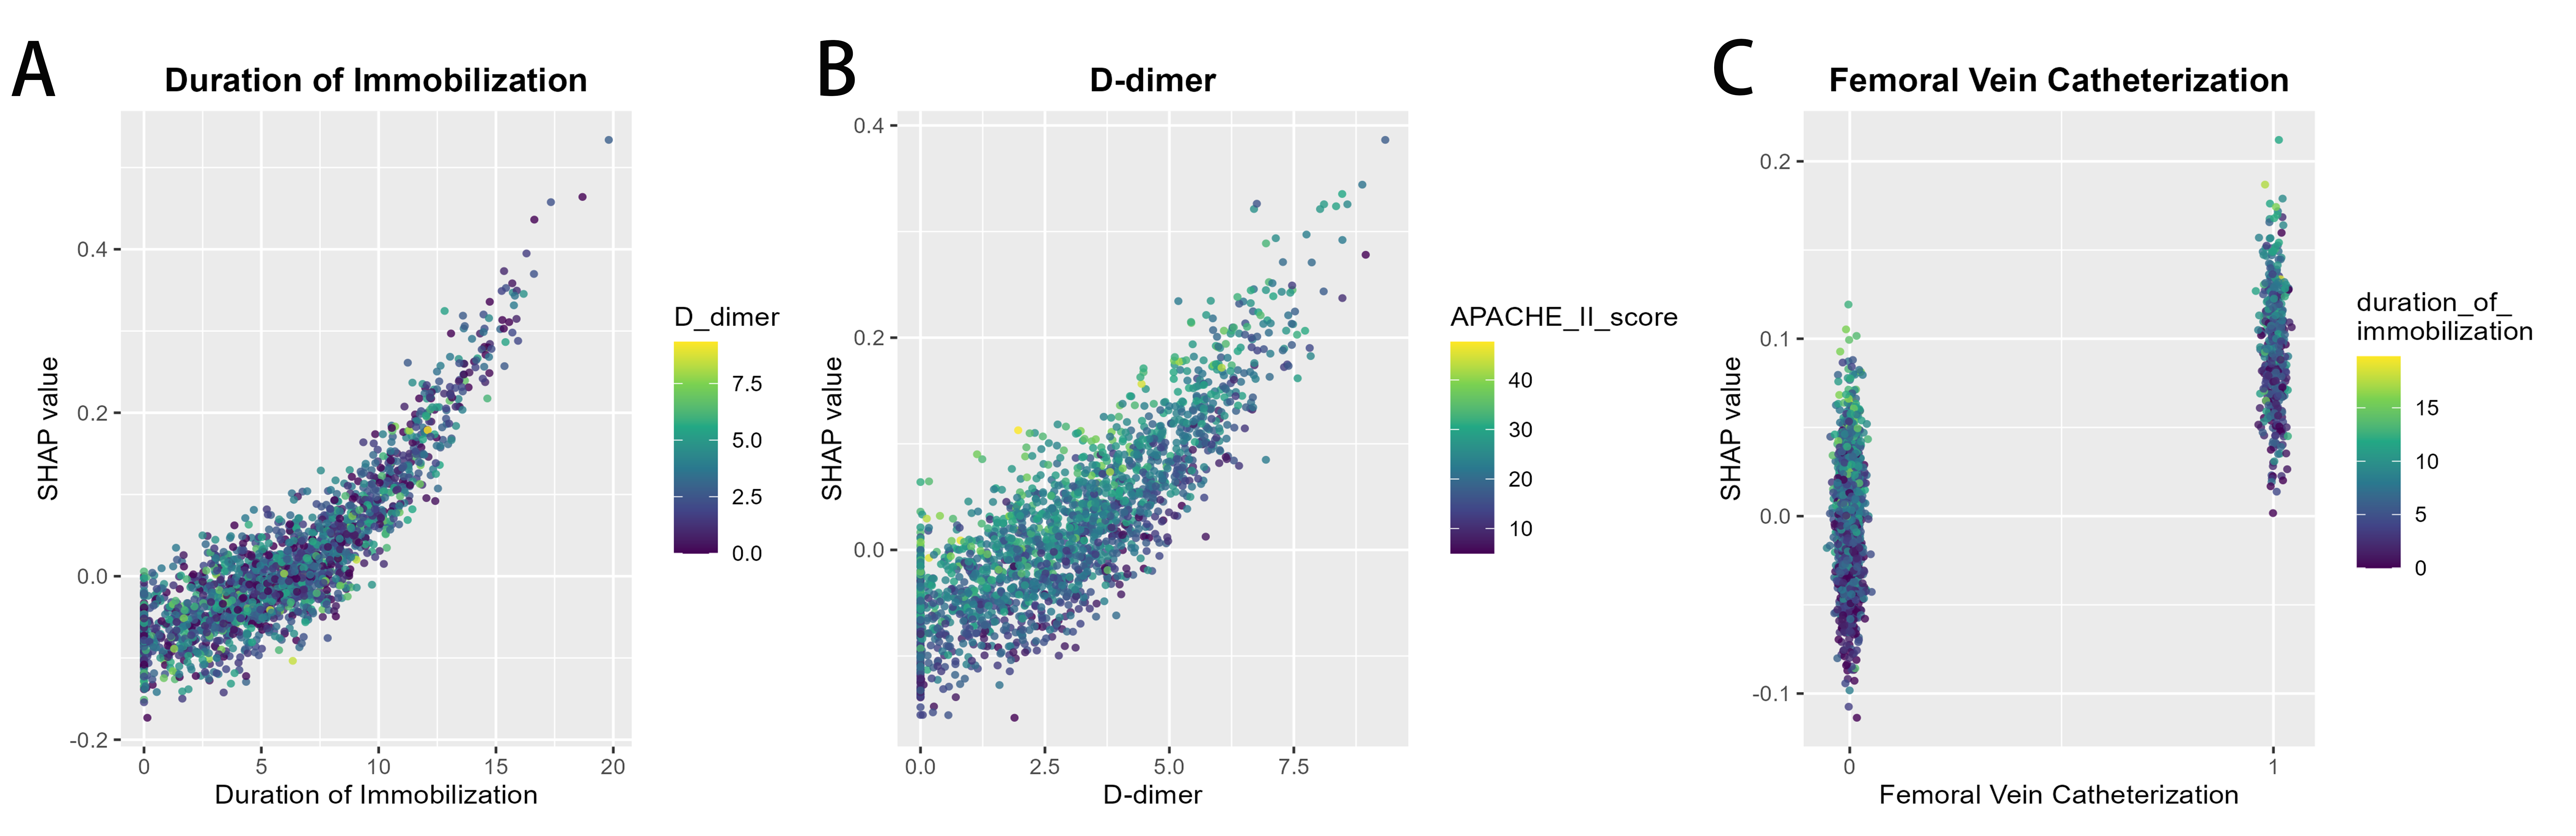


**Supplementary Figure 1.  SHAP dependence plots for the top three DVT predictors.**

SHAP values (y-axis) represent impact on risk prediction; colors indicate interacting variables. (A) Duration of immobilization shows a non-linear risk increase after 5–7 days. (B) D-dimer demonstrates a progressive non-linear risk trajectory. (C) Femoral vein catheterization increases DVT risk, acting synergistically with prolonged immobilization (yellow/green points) to yield the highest risk.

**Supplementary Table S1:** Hyperparameter tuning space and optimal values for the Random Forest model via Grid Search.

| **Hyperparameter** | **Description** | **Grid Search Space** | **Optimal Value** |
| --- | --- | --- | --- |
| n_estimators | Number of trees in the forest | [100, 300, 500, 800, 1000] | 500 |
| max_depth | Maximum depth of the tree | [None, 5, 10, 15, 20] | 10 |
| min_samples_split | Minimum number of samples required to split an internal node | [2, 5, 10] | 5 |
| min_samples_leaf | Minimum number of samples required to be at a leaf node | [1, 2, 4] | 2 |
| max_features | Number of features to consider when looking for the best split | ['sqrt', 'log2'] | 'sqrt' |

**Supplementary Table S2**.Primary ICU admission diagnoses and clinical acuity of the study population.

| **Characteristics** | **No. of patients (%)** |
| --- | --- |
| **Primary diagnosis upon ICU admission** |  |
| Severe respiratory conditions | 640 (32.0) |
| Cardiac diseases, total | 480 (24.0) |
| Ischemic heart disease | 260 (13.0) |
| Arrhythmic events | 120 (6.0) |
| Other cardiac-related issues | 100 (5.0) |
| Sepsis | 360 (18.0) |
| Severe neurological disorders | 280 (14.0) |
| Postoperative intensive monitoring | 240 (12.0) |
| **Clinical acuity indicator** |  |
| Intubation and mechanical ventilation | 1040 (52.0) |

**Supplementary Table S3:** Detailed predictive performance metrics of the optimal Random Forest model in the internal testing and external validation sets

| **Metric** | **Internal Testing Set (95% CI)** | **External Validation Set (95% CI)** |
| --- | --- | --- |
| **AUC** | 0.850 (0.801–0.900) | 0.831 (0.771–0.888) |
| **Optimal Cut-off** | 0.345 | 0.362 |
| **Sensitivity (Recall)** | 0.805 (0.742–0.856) | 0.778 (0.715–0.832) |
| **Specificity** | 0.768 (0.710–0.818) | 0.752 (0.694–0.803) |
| **Precision (PPV)** | 0.368 (0.312–0.425) | 0.385 (0.328–0.444) |
| **F1-Score** | 0.505 (0.451–0.562) | 0.515 (0.460–0.573) |

**Supplementary Table S4.** Head-to-head performance comparison of the Random Forest model, Wells score, and Caprini score in the external validation cohort

| **Model / Scoring System** | **AUC (95% CI)** | **Sensitivity** | **Specificity** | **PPV** | **NPV** |
| --- | --- | --- | --- | --- | --- |
| **Random Forest** | **0.831** (0.771–0.888) | **0.784** | **0.752** | **0.415** | **0.925** |
| **Caprini Score** | 0.701 (0.632–0.769) | 0.665 | 0.630 | 0.265 | 0.901 |
| **Wells Score** | 0.675 (0.612–0.738) | 0.582 | 0.695 | 0.285 | 0.862 |

**Note:** AUC, area under the receiver operating characteristic curve; CI, confidence interval; PPV, positive predictive value; NPV, negative predictive value.
